# Supplementary material for: SARS-CoV-2 spike-specific memory B cells express higher levels of T-bet and FcRL5 after non-severe COVID-19 as compared to severe disease
Source: PubMed Central journal article supplement (PMC8694470; doi:10.1371/journal.pone.0261656), 2021-12-22
Supplement: pone.0261656.s012.pdf [file pone.0261656.s012.pdf]

**Table S1: COVID-19 patient characteristics**

| Donor ID          | Sex | Age | Race / ethnicity    | Severity score | Medical history <sup>1</sup> | Treatment regimen <sup>2</sup> | Hospital stay (days) | Days PSO <sup>3</sup> T1 | Days PSO T2 | Days PSO T3 |
|-------------------|-----|-----|---------------------|----------------|------------------------------|--------------------------------|----------------------|--------------------------|-------------|-------------|
| <b>Non-severe</b> |     |     |                     |                |                              |                                |                      |                          |             |             |
| 25                | M   | 78  | White, non-Hispanic | 4              | DM2, OB, CKD, HTN            | R + P                          | 4                    | 18                       | n.a.        | 156         |
| 27                | F   | 48  | White, Hispanic     | 4              | OB, HTN                      | R + P                          | 2                    | 20                       | 34          | 147         |
| 29                | M   | 39  | White, Hispanic     | 4              | DM2, OB                      | R + B                          | 2                    | 15                       | 29          | 145         |
| 32                | F   | 59  | White, non-Hispanic | 4              | None                         | R + B                          | 2                    | 14                       | 31          | 139         |
| 34                | M   | 59  | White, Hispanic     | 4              | OB, CRD, HTN                 | R + P                          | 2                    | 20                       | 31          | n.a.        |
| 35                | M   | 40  | Black               | 4              | DM1, HTN                     | R + B                          | 3                    | 16                       | 28          | n.a.        |
| 38                | F   | 68  | White, Hispanic     | 4              | DM2, OB, HTN                 | R + P                          | 4                    | 19                       | 33          | n.a.        |
| 40                | F   | 25  | White, non-Hispanic | 4              | Asthma                       | R + B                          | 2                    | 14                       | 29          | n.a.        |
| 33                | F   | 20  | White, Hispanic     | 5              | OB                           | R + P                          | 2                    | n.a.                     | 28          | 138         |
| 22                | M   | 75  | White, Hispanic     | 5              | DM2, HTN                     | R + B                          | 3                    | 17                       | n.a.        | 155         |
| 21                | M   | 68  | White, Hispanic     | 6              | DM2, OB, HTN                 | R + B                          | 9                    | 21                       | n.a.        | 157         |
| <b>Severe</b>     |     |     |                     |                |                              |                                |                      |                          |             |             |
| 16                | M   | 64  | White, Hispanic     | 7              | OB                           | P                              | 12                   | n.a.                     | 35          | n.a.        |
| 28                | M   | 50  | White, Hispanic     | 7              | OB                           | R + P                          | 22                   | n.a.                     | 31          | n.a.        |
| 57                | F   | 47  | White, Hispanic     | 7              | HTN                          | R + B                          | 12                   | n.a.                     | 32          | n.a.        |
| 66                | M   | 36  | White, Hispanic     | 7              | OB                           | R + B                          | 24                   | n.a.                     | 31          | n.a.        |
| 73                | M   | 50  | White, Hispanic     | 7              | OB, HTN                      | R + P                          | 11                   | n.a.                     | 37          | n.a.        |

<sup>1</sup> DM2, diabetes mellitus type 2; HTN, hypertension; OB, obesity; CKD, chronic kidney disease; CRD, chronic respiratory disease

<sup>2</sup> R, remdesivir; B, baricitinib; P, placebo

<sup>3</sup> PSO, post-symptom onset; n.a., not available
