# Supplementary material for: SARS-CoV-2 spike-specific memory B cells express higher levels of T-bet and FcRL5 after non-severe COVID-19 as compared to severe disease
Source: PubMed Central journal article supplement (PMC8694470; doi:10.1371/journal.pone.0261656), 2021-12-22
Supplement: pone.0261656.s013.pdf [file pone.0261656.s013.pdf]

**Table S2: Reagents and antibodies used for spectral flow cytometry**

| Reagent / antibody    | Fluorophore  | Clone     | Company / catalog number |
|-----------------------|--------------|-----------|--------------------------|
| Live/dead stain       | Zombie UV    |           | BioLegend / 423107       |
| Streptavidin (RBD)    | BV421        |           | BioLegend / 405226       |
| Streptavidin (spike1) | PE           |           | Tonbo / 504317U100       |
| Streptavidin (spike2) | APC          |           | Tonbo / 204317U100       |
| CD11c                 | AF532        | N418      | Thermo / 58011482        |
| CD19                  | SB645        | SJ25C1    | Thermo / 64019842        |
| CD20                  | BV785        | 2H7       | BioLegend / 302355       |
| CD21                  | PerCP-eF710  | HB5       | Thermo / 46021942        |
| CD24                  | BV605        | ML5       | BioLegend / 311123       |
| CD27                  | PE-Cy7       | LG.3A10   | BioLegend / 124215       |
| CD38                  | APC-Fire/810 | HIT2      | BioLegend / 303549       |
| CD73                  | PerCP-Cy5.5  | AD2       | BioLegend / 344013       |
| CD80                  | PE-Cy5       | 2D10      | BioLegend / 305210       |
| CD95                  | BUV737       | DX2       | BD / 612790              |
| CXCR3                 | PerCP        | G025H7    | BioLegend / 353740       |
| CXCR5                 | APC-Cy7      | J252D4    | BioLegend / 356925       |
| FcRL5                 | BUV805       | 509F6     | BD / 749599              |
| IgA                   | FITC         | IS11-8E10 | Miltenyi / 130093073     |
| IgD                   | PE/Dazzle    | IA6-2     | BioLegend / 348239       |
| IgG                   | BV510        | M1310G05  | BioLegend / 410715       |
| IgM                   | BV711        | MHM-88    | BioLegend / 314539       |
| Ki-67 (intracellular) | AF700        | Ki-67     | BioLegend / 350529       |
| T-bet (intracellular) | Pacific Blue | 4B10      | BioLegend / 644807       |
